# Supplementary material for: Meta-analyses of visceral versus non-visceral metastatic hormone receptor-positive breast cancer treated by endocrine monotherapies
Source: PubMed Central journal article supplement (PMC7881093; doi:10.1038/s41523-021-00222-y), 2021-02-12
Supplement: 41523_2021_222_MOESM1_ESM.pdf [file 41523_2021_222_MOESM1_ESM.pdf]

**Supplementary Table 1. Median PFS and OS in previously published trials**

|                               |              |                              | Median PFS, months (95% CI) | HR                                   | Median OS, months (95% CI) | HR                              |
|-------------------------------|--------------|------------------------------|-----------------------------|--------------------------------------|----------------------------|---------------------------------|
| <b>FALCON<sup>a1</sup></b>    | All patients | Fulvestrant                  | 16.6                        | 0.797 (95% CI 0.637–0.999; p=0.0486) | -                          | 0.88 (95% CI 0.63–1.22, p=0.43) |
|                               |              | Anastrozole                  | 13.8                        |                                      | -                          |                                 |
|                               | VM           | Fulvestrant                  | 13.8                        | 0.99 (95% CI 0.74–1.33)              | -                          | -                               |
|                               |              | Anastrozole                  | 15.9                        |                                      | -                          |                                 |
|                               | Non-VM       | Fulvestrant                  | 22.3                        | 0.59 (95% CI 0.42–0.84)              | -                          | -                               |
|                               |              | Anastrozole                  | 13.8                        |                                      | -                          |                                 |
| <b>FIRST<sup>2-4</sup></b>    | All patients | Fulvestrant                  | 23.4                        | 0.66 (95% CI 0.47–0.92; p=0.01)      | 54.1                       | 0.70 (95% CI 0.50–0.98; p=0.04) |
|                               |              | Anastrozole                  | 13.1                        |                                      | 48.4                       |                                 |
|                               | VM           | Fulvestrant                  | 9.8                         | 0.82 (95% CI 0.54–1.26)              | 32.1                       | 0.86 (95% CI 0.56–1.34)         |
|                               |              | Anastrozole                  | 9.9                         |                                      | 38.5                       |                                 |
|                               | Non-VM       | Fulvestrant                  | 34.0                        | 0.58 (95% CI 0.34–0.99)              | 76.6                       | 0.68 (95% CI 0.40–1.18)         |
|                               |              | Anastrozole                  | 21.3                        |                                      | 60.9                       |                                 |
| <b>PALOMA-1<sup>5</sup></b>   | All patients | Palbociclib plus letrozole   | 20.2                        | 0.488 (95% CI 0.319–0.748; p=0.0004) | 37.5                       | 0.90 (95% CI 0.62–1.29; p=0.28) |
|                               |              | Letrozole monotherapy        | 10.2                        |                                      | 34.5                       |                                 |
| <b>PALOMA-2<sup>6</sup></b>   | All patients | Palbociclib plus letrozole   | 24.8                        | 0.58 (95% CI 0.46–0.72; p<0.001)     | -                          | -                               |
|                               |              | Letrozole monotherapy        | 14.5                        |                                      | -                          |                                 |
|                               | VM           | Palbociclib plus letrozole   | -                           | 0.63 (95% CI 0.47–0.85)              | -                          | -                               |
|                               |              | Letrozole monotherapy        | -                           |                                      | -                          |                                 |
|                               | Non-VM       | Palbociclib plus letrozole   | -                           | 0.50 (95% CI 0.36–0.70)              | -                          | -                               |
|                               |              | Letrozole monotherapy        | -                           |                                      | -                          |                                 |
| <b>PALOMA-3<sup>7,8</sup></b> | All patients | Palbociclib plus fulvestrant | 9.2                         | 0.42 (95% CI 0.32–0.56; p<0.001)     | 34.9                       | 0.81 (95% CI 0.64–1.03; p=0.09) |
|                               |              | Fulvestrant plus placebo     | 3.8                         |                                      | 28.0                       |                                 |
|                               | VM           | Palbociclib plus fulvestrant | -                           | 0.45 (95% CI 0.32–0.63)              | 27.6                       | 0.85 (95% CI 0.64–1.13)         |

Supplementary materials: Robertson et al. Vis versus non-Vis metastases

|                                    |              |                              |      |                                     |      |                                       |
|------------------------------------|--------------|------------------------------|------|-------------------------------------|------|---------------------------------------|
|                                    |              | Fulvestrant plus placebo     | -    |                                     | 24.7 |                                       |
|                                    | Non-VM       | Palbociclib plus fulvestrant | -    | 0.36 (95% CI 0.22–0.60)             | -    | -                                     |
|                                    |              | Fulvestrant plus placebo     | -    |                                     | -    | -                                     |
| <b>MONARCH-2<sup>9</sup></b>       | All patients | Fulvestrant plus abemaciclib | 16.4 | 0.553 (95% CI 0.449–0.681; p<0.001) | 46.7 | 0.757 (95% CI 0.606–0.945; p=0.01)    |
|                                    | All patients | Fulvestrant plus placebo     | 9.3  |                                     | 37.3 |                                       |
| <b>MONALEESA-3<sup>10,11</sup></b> | All patients | Fulvestrant plus ribociclib  | 20.5 | 0.593 (95% CI 0.480–0.732; p<0.001) | NR   | 0.724 (95% CI 0.568–0.924; p=0.00455) |
|                                    |              | Fulvestrant plus placebo     | 12.8 |                                     | 40.0 |                                       |
|                                    | First-line   | Fulvestrant plus ribociclib  | 33.6 | 0.546 (95% CI 0.415–0.718)          | NR   | 0.700 (95% CI 0.479–1.021)            |
|                                    |              | Fulvestrant plus placebo     | 19.2 |                                     | 45.1 |                                       |

<sup>a</sup>Kaplan Meier curves and median overall survival could not be calculated due to insufficient follow-up time (31% maturity).

**a**

**PFS (First-line)**

**OS (First-line)<sup>†</sup>**

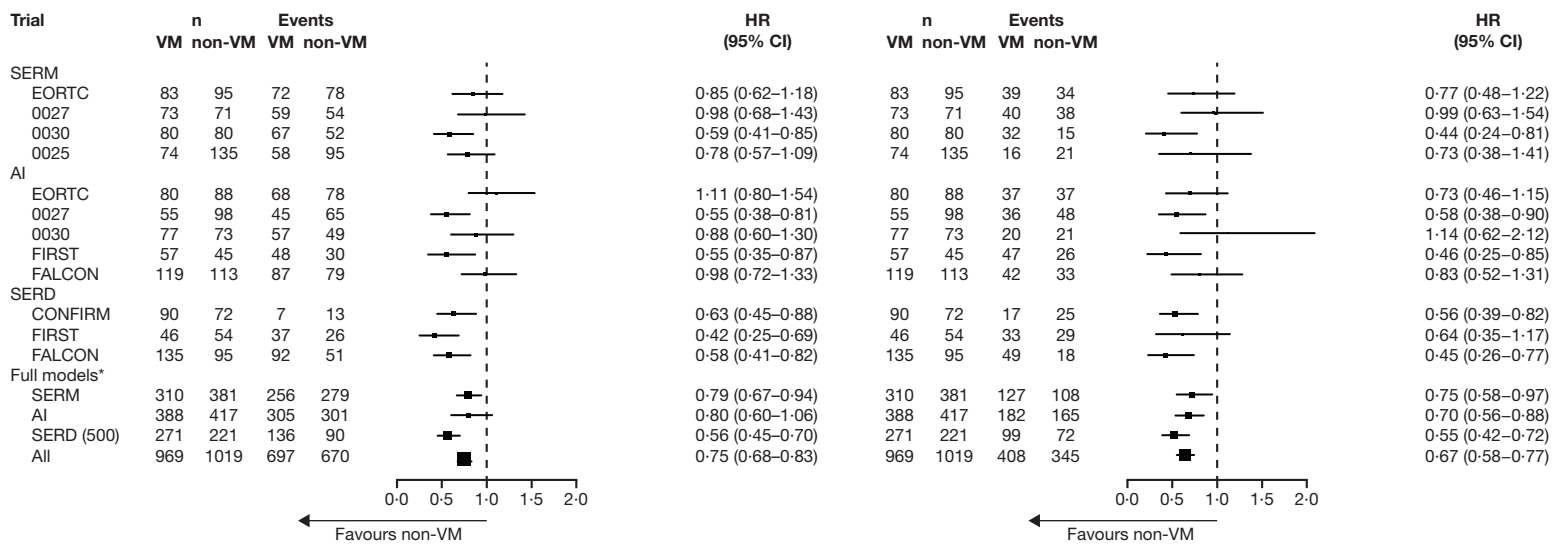

\*Random effect for trial were fitted to AI and all data

\*Fixed effects for trial were fitted in all models

**DoCB (First-line)**

**CBR (First-line)**

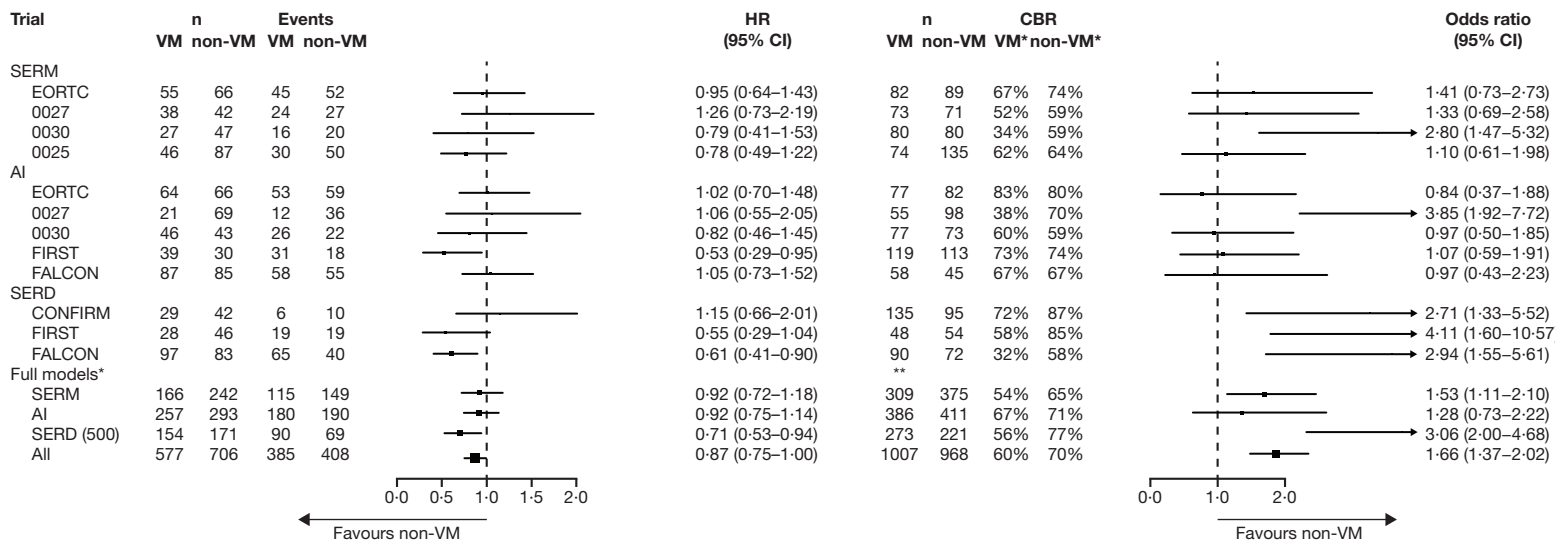

\*Random effect for trial were fitted to all

\*CONFIRM recruited first- and second-line line patients, output contains 1st line only

\*\*Fixed effect model was fitted to the SERD, SERM and all data, random effects for trial were included in the models for AI

**b**

**PFS (Second-line)**

**OS (Second-line)**

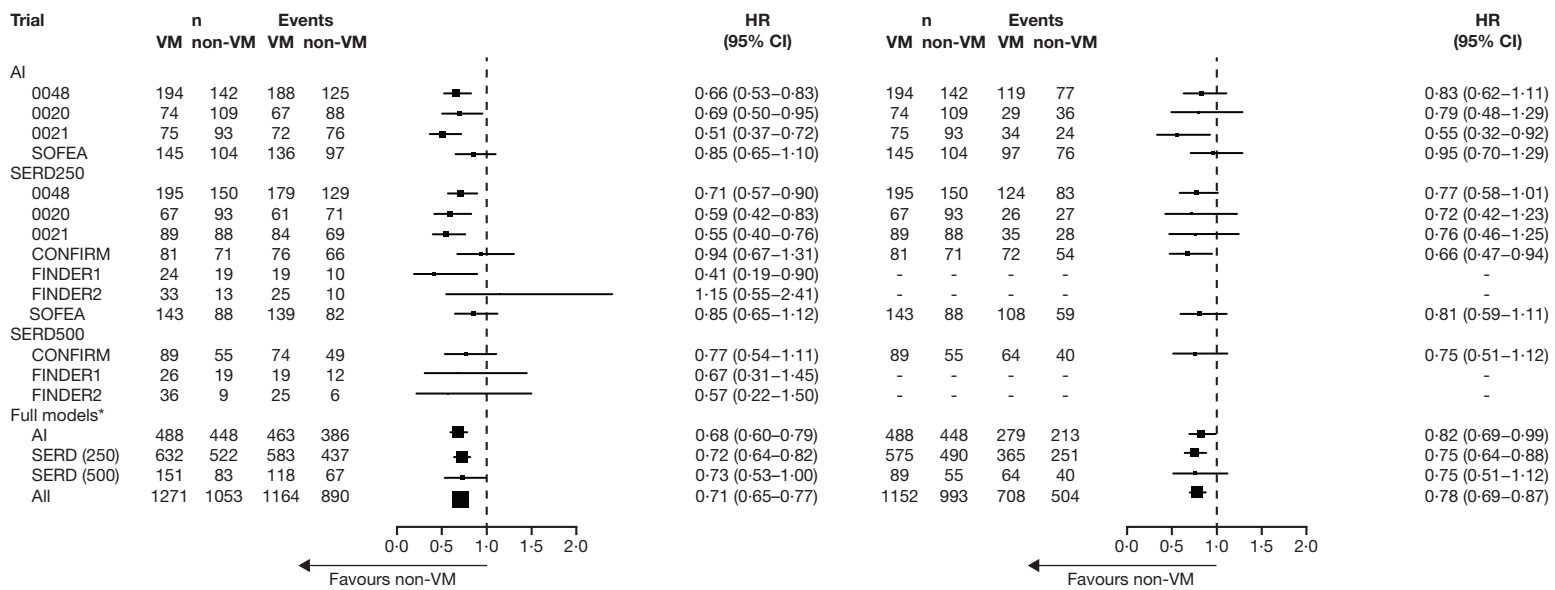

\*Fixed effect models fitted to all

\*Fixed effects models were fitted to all data

**DoCB (Second-line)**

**CBR (Second-line)**

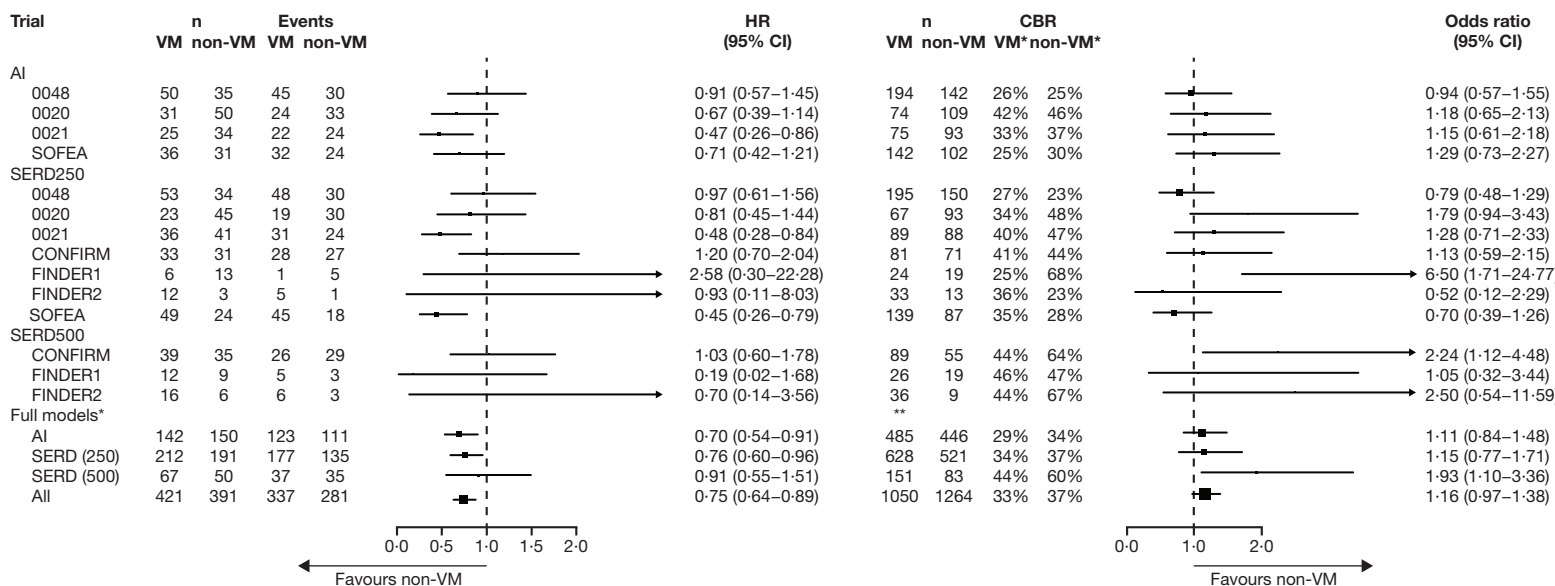

\*Fixed effects models were fitted to all data

\*CONFIRM recruited first- and second-line line patients, output contains 1st line only

\*\*Fixed effect model was fitted to the SERD, SERM and all data, random effects for trial were included in the models for AI

**Supplementary Figure 1: Clinical outcomes for VM versus non-VM by endocrine agent and study**

**a** Forest plots of PFS, OS, DoCB and CBR in the first-line setting. **b** Forest plots of PFS, OS, DoCB and CBR in the second-line setting.

AI, aromatase inhibitor; CBR, clinical benefit rate; DoCB, duration of clinical benefit; HR, hazard ratio; n, number of patients; non-VM, non-visceral metastases; PFS, progression-free survival; OR, odds ratio; OS, overall survival; SERD, selective estrogen receptor degrader; SERM, selective estrogen receptor modulator; VLM, visceral liver metastases; VM, visceral metastases; VnLM, visceral non-liver metastases.

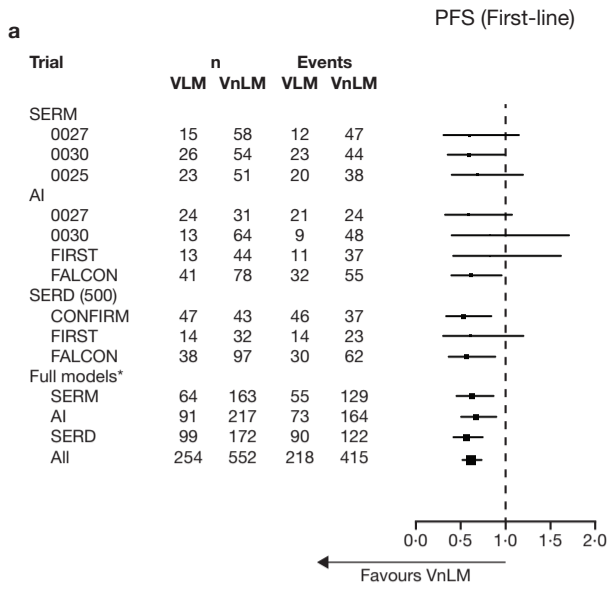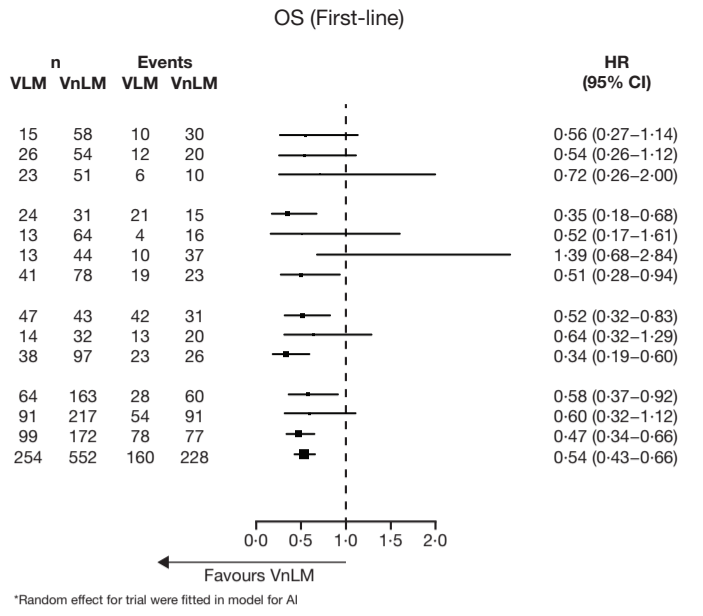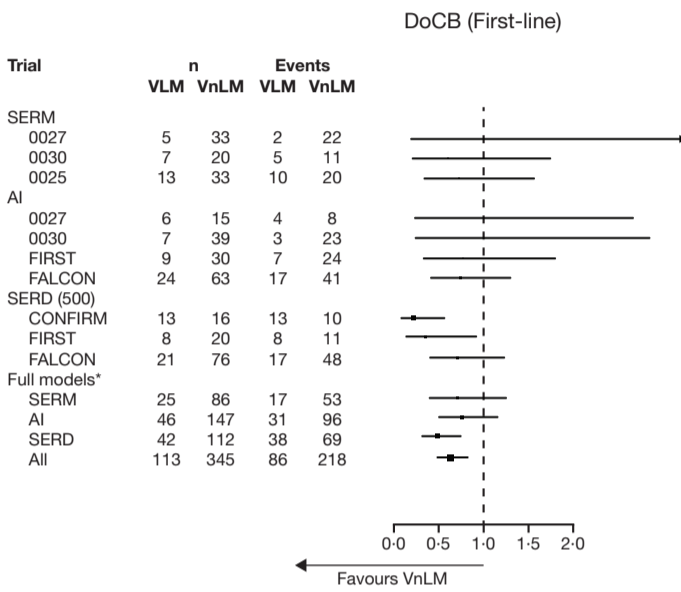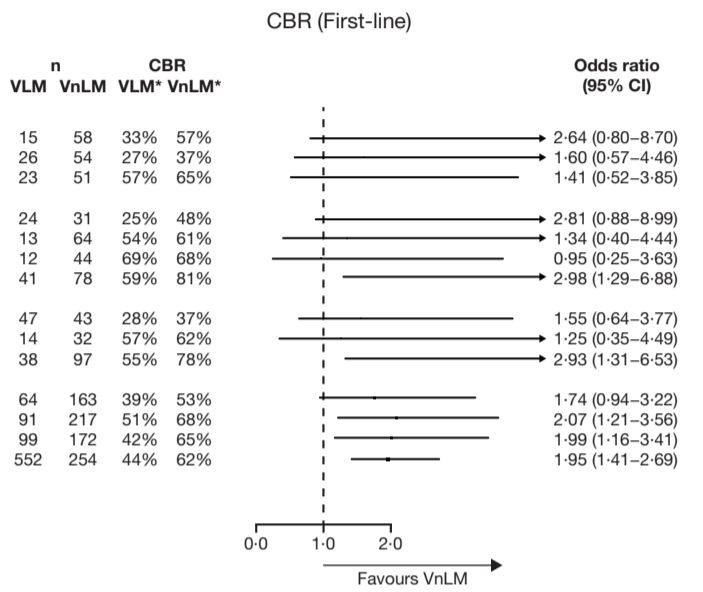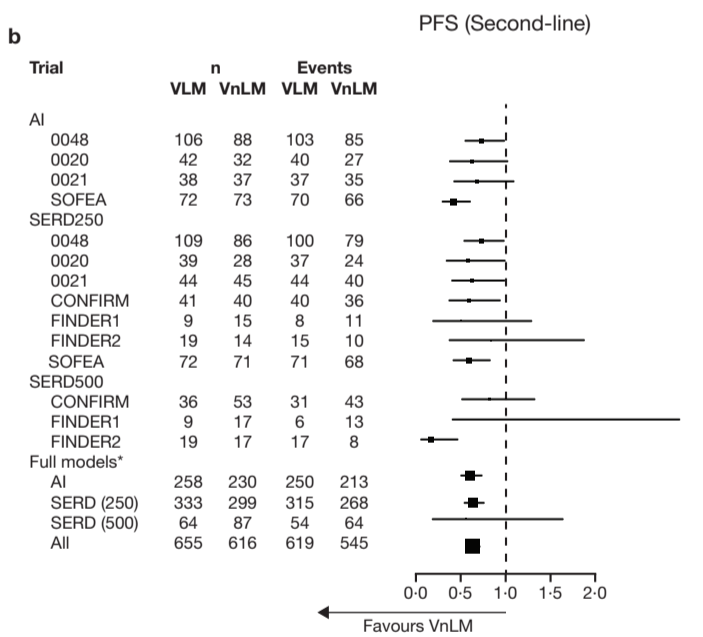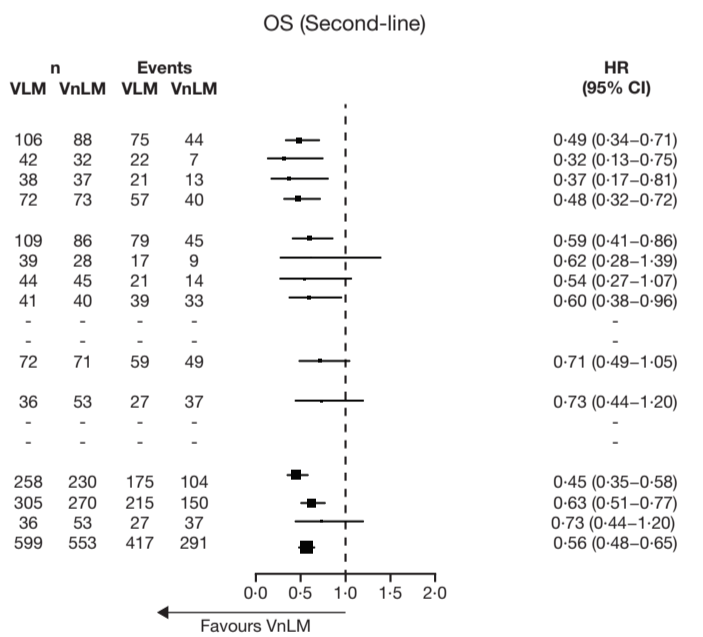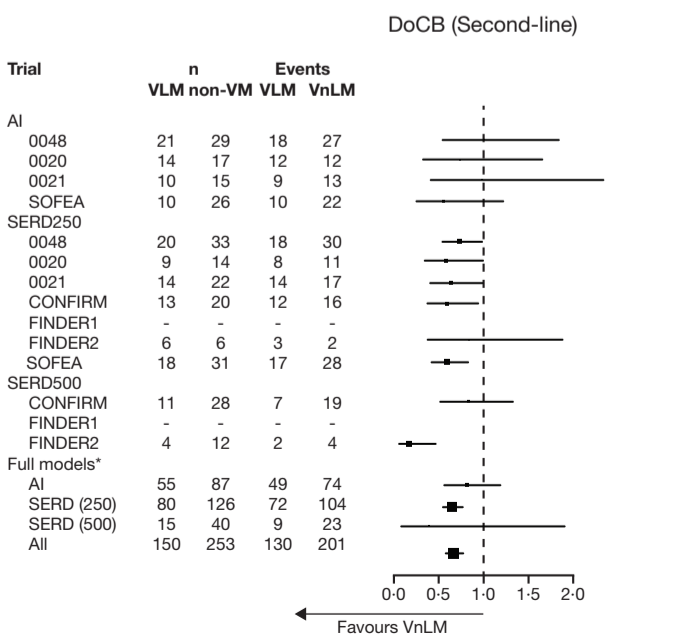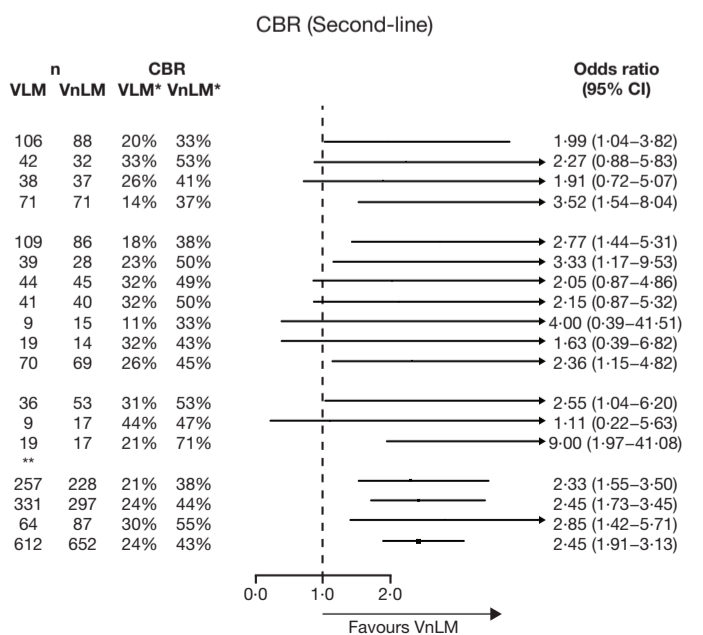

**Supplementary Figure 2: Clinical outcomes for VnLM and VLM by endocrine agent and study**

**a** Forest plots of PFS, OS, DoCB and CBR in the first-line setting. **b** Forest plots of PFS, OS, DoCB and CBR second-line setting.

AI, aromatase inhibitor; CBR, clinical benefit rate; DoCB, duration of clinical benefit; HR, hazard ratio; n, number of patients; non-VM, non-visceral metastases; PFS, progression-free survival; OR, odds ratio; OS, overall survival; SERD, selective estrogen receptor degrader; SERM, selective estrogen receptor modulator; VLM, visceral liver metastases; VM, visceral metastases; VnLM, visceral non-liver metastases.

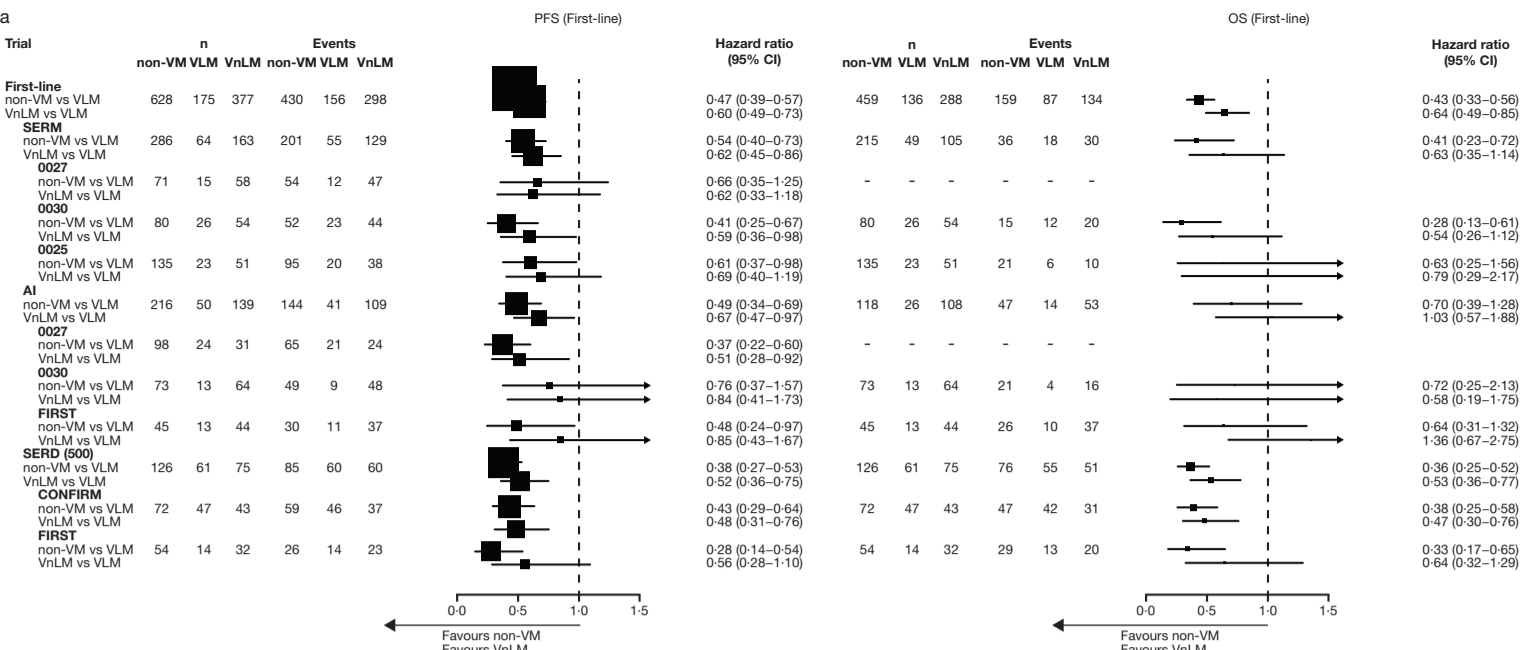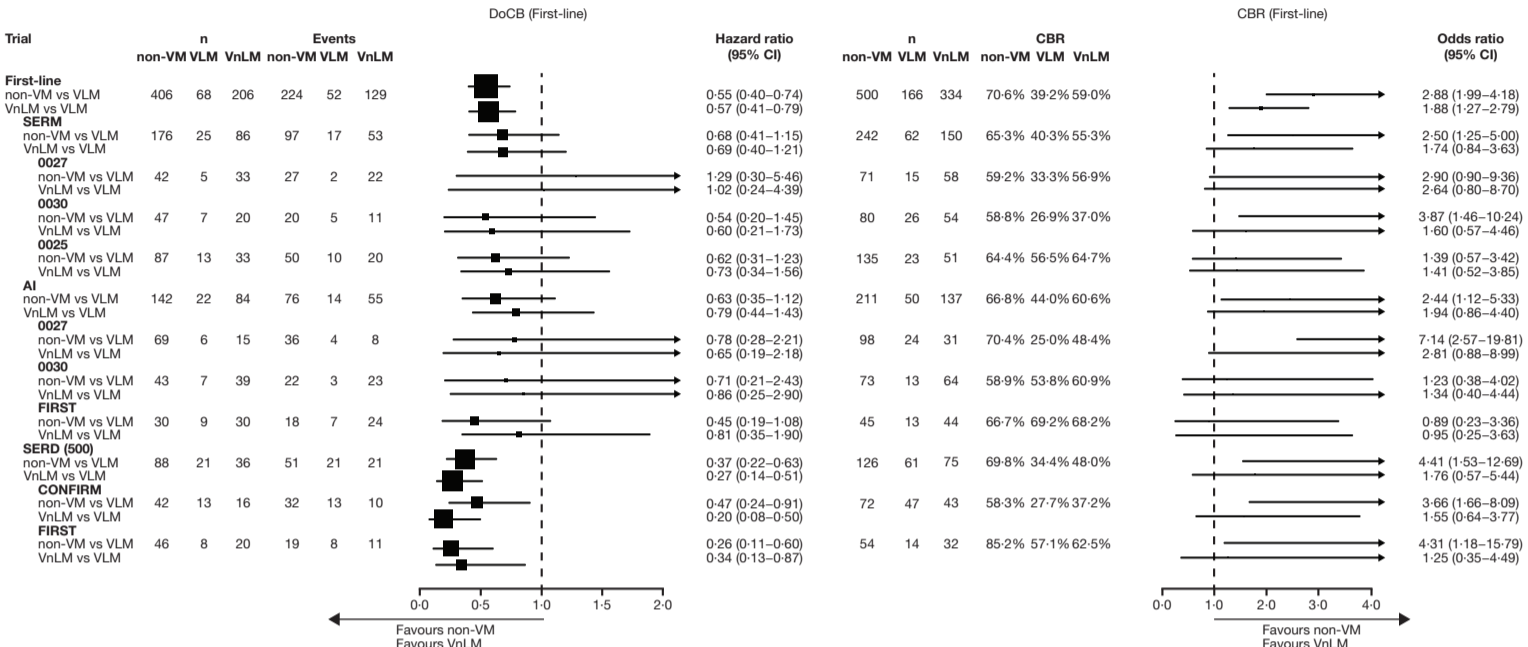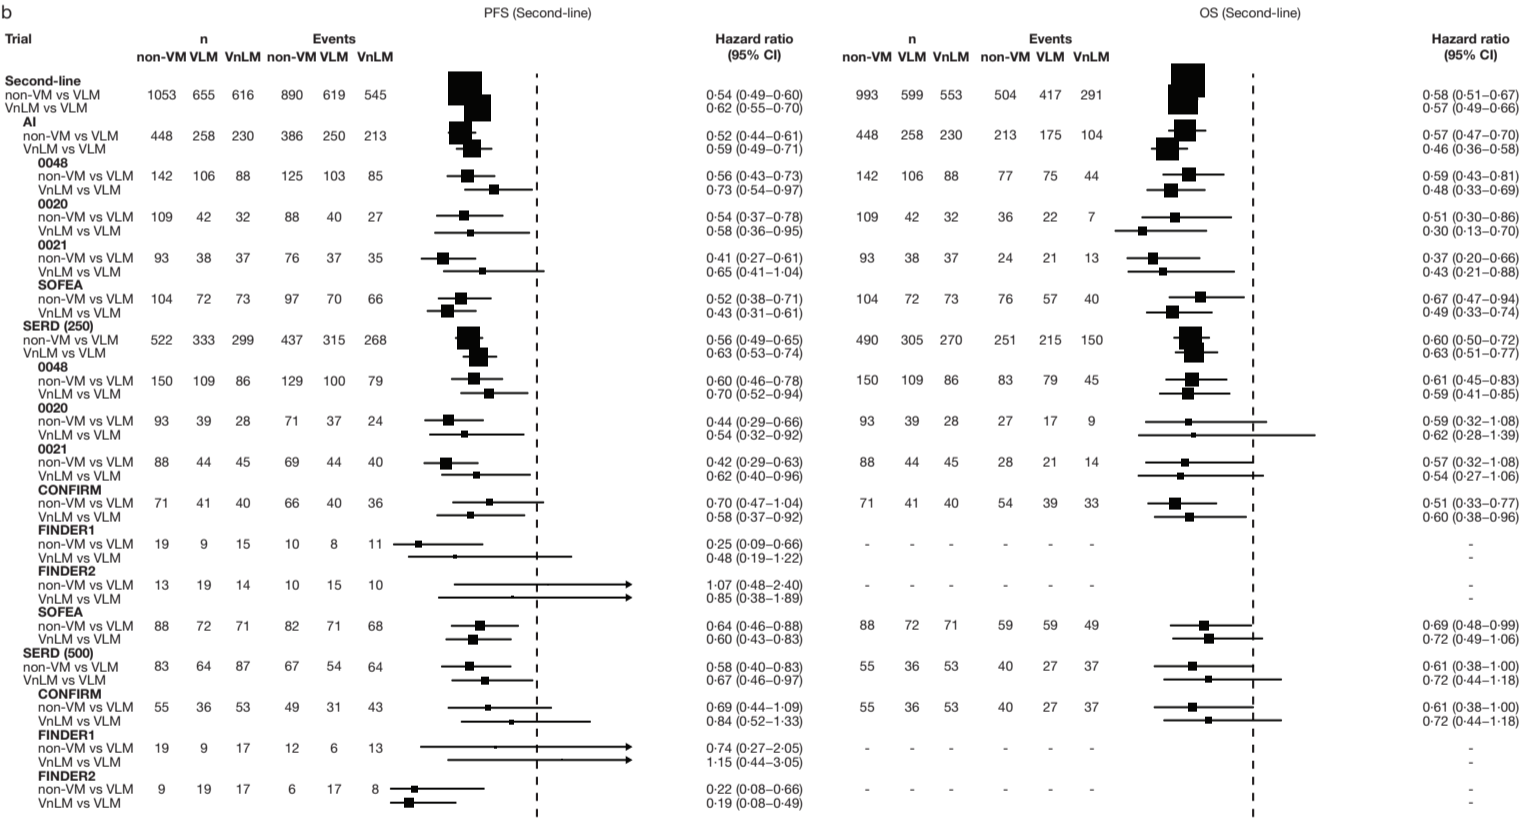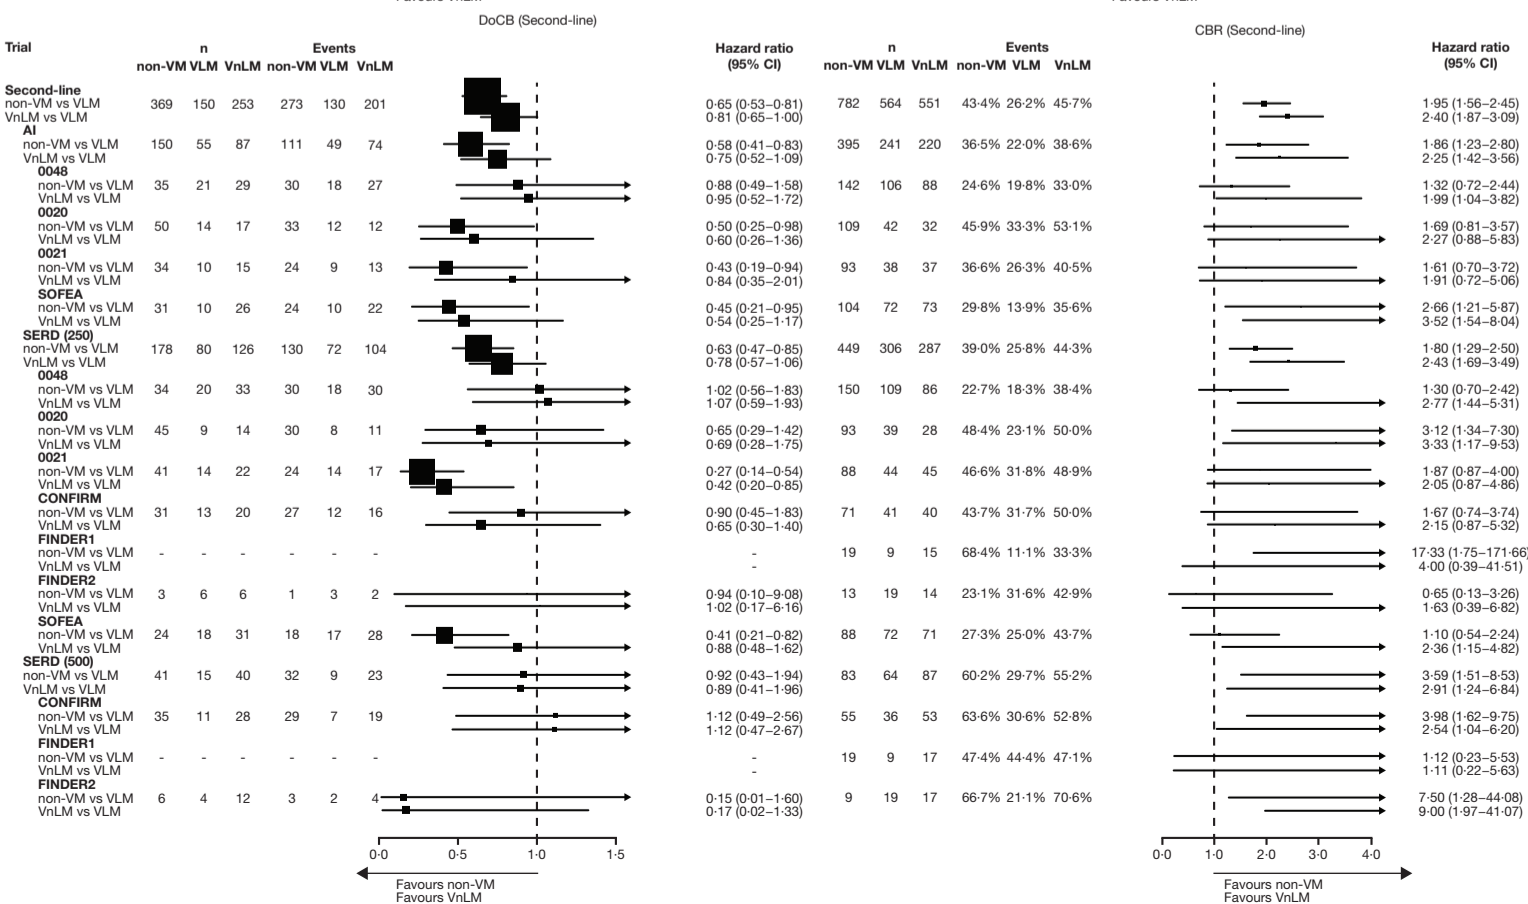

**Supplementary Figure 3: Clinical outcomes for non-VM and VnLM versus VLM by endocrine agent**

**a** Forest plots of PFS, OS, DoCB and CBR in the first-line setting. **b** Forest plots of PFS, OS, DoCB and CBR in the second-line setting.

AI, aromatase inhibitor; CBR, clinical benefit rate; DoCB, duration of clinical benefit; HR, hazard ratio; n, number of patients; non-VM, non-visceral metastases; PFS, progression-free survival; OR, odds ratio; OS, overall survival; SERD, selective estrogen receptor degrader; SERM, selective estrogen receptor modulator; VLM, visceral liver metastases; VM, visceral metastases; VnLM, visceral non-liver metastases.



Patients with postmenopausal, ER/PR+, HER2-,  
MBC without prior ET for advanced disease (first-line),  
or with progression following prior ET (second-line)

VM

Non-VM  
or  
VnLM

VLM

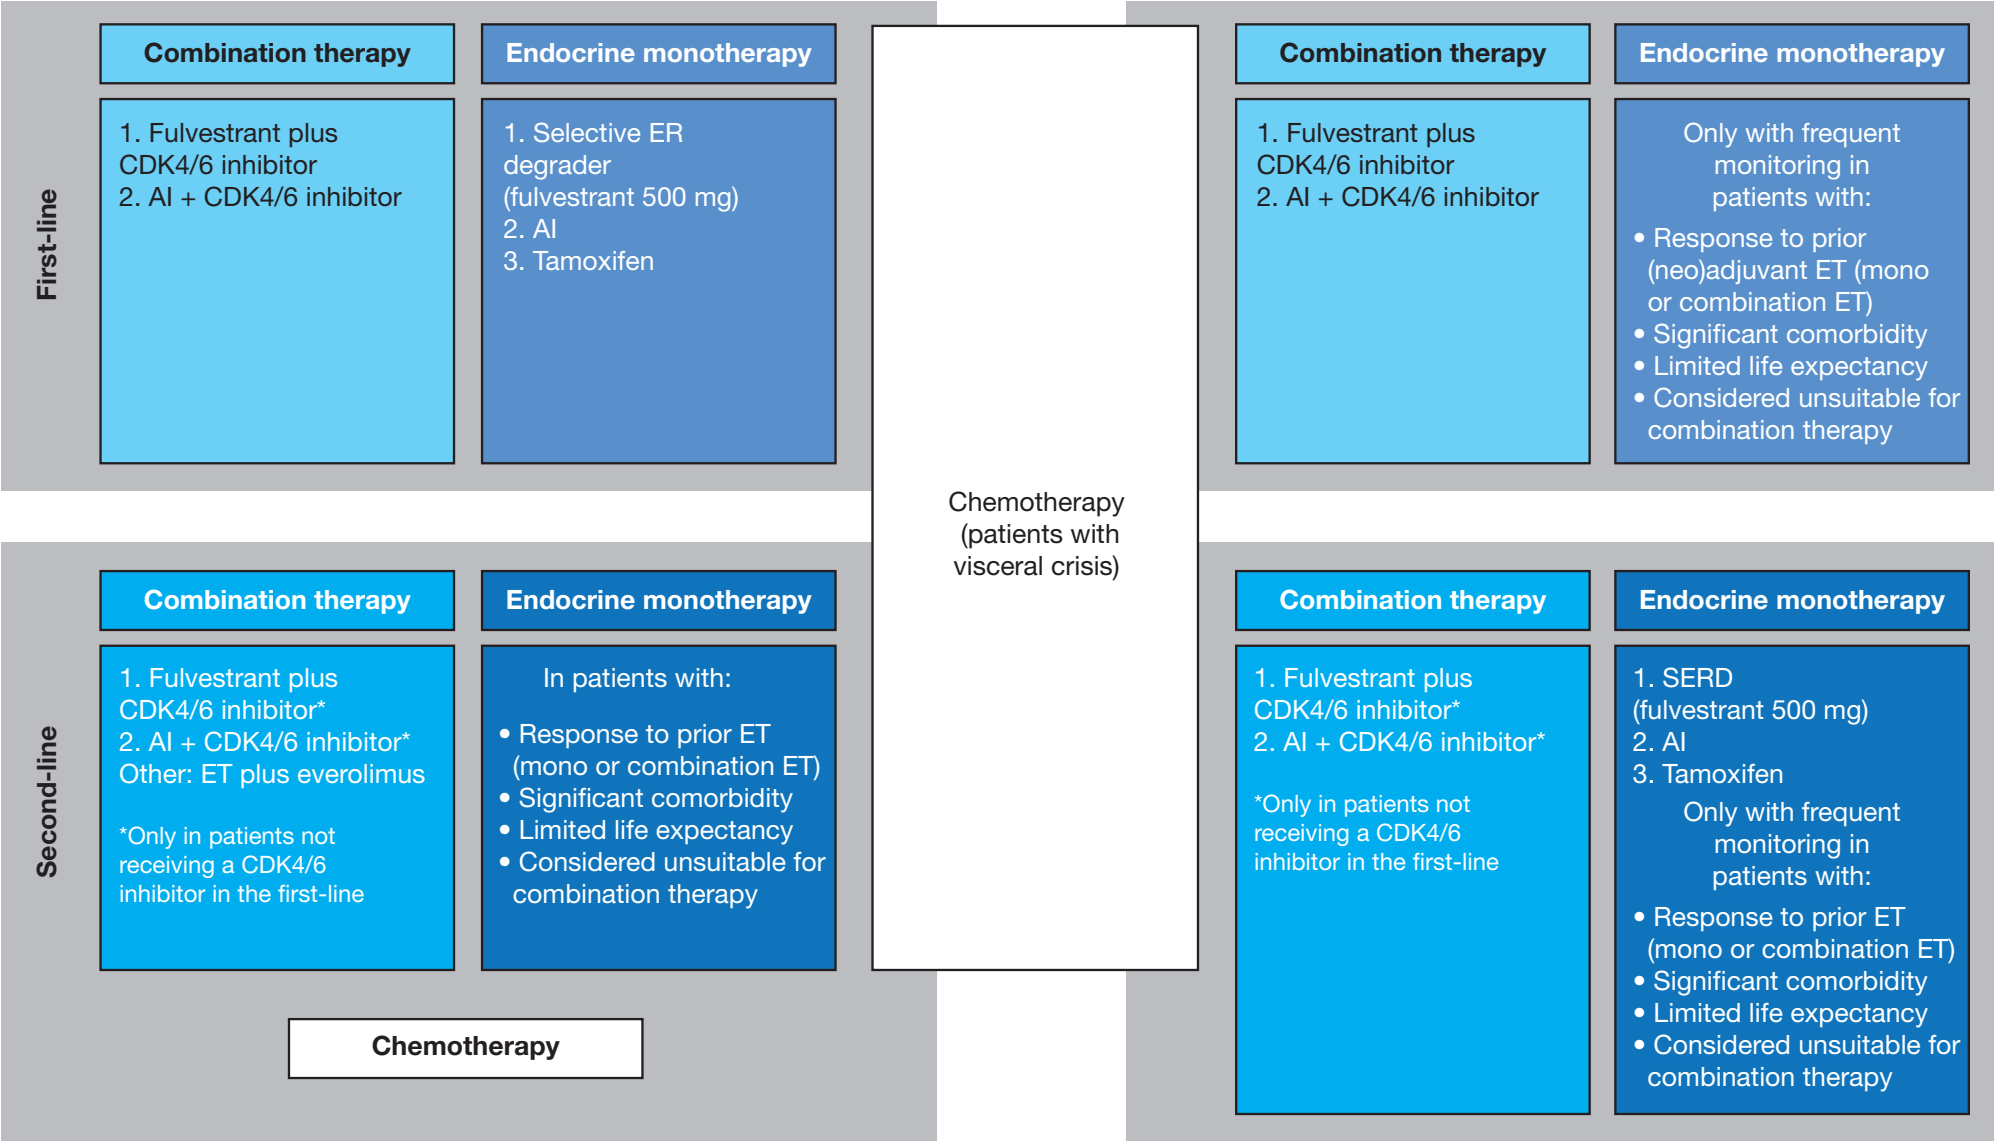

**Supplementary Figure 4: Potential first- and second-line treatment options in patients with HR+ ABC with or without VM**

ABC, advanced breast cancer; AI, aromatase inhibitor; CDK, cyclin-dependent kinase; ER+, estrogen receptor-positive; ET, endocrine therapy; HER2-, human epidermal growth factor 2-negative; HR+, hormone receptor-positive; PR+, progesterone receptor-positive; SERD, selective estrogen receptor degrader; VLM, visceral liver metastases; VM, visceral metastases; VnLM, visceral non-liver metastases.

## Supplementary References

1. Robertson, J.F.R. et al. Fulvestrant 500 mg versus anastrozole 1 mg for hormone receptor-positive advanced breast cancer (FALCON): an international, randomised, double-blind, phase 3 trial. *Lancet* **388**, 2997-3005 (2016)
2. Ellis, M.J. et al. Fulvestrant 500 mg versus anastrozole 1 mg for the first-line treatment of advanced breast cancer: overall survival analysis from the Phase II FIRST study. *J. Clin. Oncol.* **33**, 3781-3787 (2015).
3. Robertson, J.F.R. et al. Fulvestrant 500 mg versus anastrozole 1 mg for the first-line treatment of advanced breast cancer: follow-up analysis from the randomized 'FIRST' study. *Breast Cancer Res. Treat.* **136**, 503-511 (2012).
4. Robertson, J.F.R., Di Leo, A., Fazal, M., Lichfield, J. & Ellis, M.J. Fulvestrant for hormone receptor-positive advanced breast cancer in patients with visceral versus non-visceral metastases: Findings from FALCON, FIRST, AND CONFIRM. *Cancer Res.* **78**, PD5–09 (2018).
5. Finn, R.S. et al. The cyclin-dependent kinase 4/6 inhibitor palbociclib in combination with letrozole versus letrozole alone as first-line treatment of oestrogen receptor-positive, HER2-negative, advanced breast cancer (PALOMA-1/TRIO-18): a randomised phase 2 study. *Lancet Oncol.* **16**, 25-35 (2015)
6. Finn, R.S. et al. Palbociclib and letrozole in advanced breast cancer. *N. Engl. J. Med.* **375**, 1925-1936 (2016).
7. Turner, N.C. et al. Overall survival with palbociclib and fulvestrant in advanced breast cancer. *N. Engl. J. Med.* **379**, 1926-1936 (2018).

8. Turner, N.C. et al. Palbociclib in hormone-receptor-positive advanced breast cancer. *N. Engl. J. Med.* **373**, 209-219 (2015).
9. Sledge, G.W. Jr. et al. The effect of abemaciclib plus fulvestrant on overall survival in hormone receptor-positive, ERBB2-negative breast cancer that progressed on endocrine therapy-MONARCH 2: a randomized clinical trial. *JAMA Oncol.* **6**, 116–124 (2020).
10. Slamon, D.J. et al. Overall survival (OS) results of the Phase III MONALEESA-3 trial of postmenopausal patients (pts) with hormone receptor-positive (HR+), human epidermal growth factor 2-negative (HER2-) advanced breast cancer (ABC) treated with fulvestrant (FUL) ± ribociclib (RIB). *Ann. Oncol.* **30**, v851-v934 (2019).
11. Slamon, D.J. et al. Phase III randomized study of ribociclib and fulvestrant in hormone receptor-positive, human epidermal growth factor receptor 2-negative advanced breast cancer: MONALEESA-3. *J. Clin. Oncol.* **36**, 2465-2472 (2018).
